# Supplementary material for: A Two Decade Examination of Historical Race/Ethnicity Disparities in Academic Achievement by Poverty Status
Source: Springer Nature journal article supplement (doi:10.1007/s10964-017-0800-7), 2018-01-08
Supplement: MOESM3 [file 15350188]

Table 3. 13-14 Year Old Reading Sample Sizes, Standardized Means, and Standard Deviations, Aggregated Biennially from 1986 - 2005

|  | **Poor White** | | | **Non-Poor White** | | | **Poor Black** | | | **Non-Poor Black** | | | **Poor Hispanic** | | | **Non-Poor Hispanic** | | |
| --- | --- | --- | --- | --- | --- | --- | --- | --- | --- | --- | --- | --- | --- | --- | --- | --- | --- | --- |
| **Year** | **N** | **M** | **SD** | **N** | **M** | **SD** | **N** | **M** | **SD** | **N** | **M** | **SD** | **N** | **M** | **SD** | **N** | **M** | **SD** |
| **1986** | 2 | -1.18 | 1.64 | 2 | -0.15 | 1.49 | 4 | -1.25 | 0.93 | 2 | -1.00 | 0.42 | 2 | -1.85 | 0.36 | 2 | -0.08 | 0.20 |
| **1988** | 8 | -0.28 | 0.91 | 9 | 0.00 | 1.48 | 21 | -0.74 | 0.95 | 23 | -0.65 | 0.92 | 12 | -0.71 | 1.09 | 23 | -0.14 | 1.11 |
| **1990** | 8 | -0.10 | 0.37 | 23 | -0.43 | 1.08 | 33 | -0.82 | 0.87 | 40 | -0.01 | 0.85 | 9 | -0.73 | 1.55 | 42 | 0.29 | 0.78 |
| **1992** | 18 | -0.02 | 0.96 | 37 | -0.05 | 0.87 | 50 | -0.39 | 0.90 | 45 | -0.25 | 0.89 | 15 | -0.62 | 0.73 | 67 | 0.00 | 1.01 |
| **1994** | 20 | -0.68 | 0.81 | 52 | -0.17 | 1.04 | 68 | -0.64 | 0.96 | 62 | -0.10 | 0.88 | 20 | 0.03 | 0.88 | 110 | 0.28 | 0.93 |
| **1996** | 23 | -0.40 | 1.03 | 63 | 0.00 | 1.01 | 48 | -0.60 | 0.80 | 81 | -0.27 | 0.92 | 23 | -0.07 | 1.21 | 141 | 0.12 | 0.96 |
| **1998** | 23 | -0.65 | 1.33 | 62 | 0.12 | 0.97 | 52 | -0.57 | 0.92 | 71 | -0.32 | 0.98 | 27 | 0.00 | 0.88 | 160 | 0.25 | 0.83 |
| **2000** | 14 | -0.21 | 0.94 | 37 | 0.19 | 0.95 | 31 | -0.69 | 1.01 | 51 | -0.13 | 1.00 | 21 | -0.16 | 1.24 | 131 | 0.24 | 0.91 |
| **2002** | 17 | -0.19 | 1.09 | 55 | 0.32 | 0.84 | 28 | -0.87 | 1.09 | 75 | 0.02 | 1.07 | 21 | -0.10 | 0.83 | 149 | 0.30 | 0.86 |
| **2004** | 19 | -0.73 | 1.50 | 45 | 0.29 | 0.80 | 25 | -0.73 | 0.91 | 51 | -0.22 | 0.80 | 12 | 0.28 | 0.74 | 167 | 0.44 | 0.85 |
| **2005** | 14 | -0.32 | 1.18 | 49 | 0.03 | 0.94 | 31 | -0.61 | 0.93 | 44 | 0.11 | 1.01 | 13 | 0.16 | 0.88 | 151 | 0.54 | 0.78 |
